# Supplementary material for: Sources and pathways of biocides and their transformation products in urban storm water infrastructure of a 2 ha urban district
Source: Copernicus journal article supplement (doi:10.5194/hess-25-4495-2021), 2021-08-20
Supplement: Supplementary file 1 [file hess-25-4495-2021-supplement.zip]

Archive with 3 entries (3 files):
- TableS1.pdf
- hess-25-4495-2021-supplement-title-page.pdf
- TableS2.pdf
