# Supplementary material for: Sources and pathways of biocides and their transformation products in urban storm water infrastructure of a 2 ha urban district
Source: Copernicus journal article supplement (doi:10.5194/hess-25-4495-2021), 2021-08-20
Supplement: Supplementary file 1 [file hess-25-4495-2021-supplement.zip › hess-25-4495-2021-supplement-title-page.pdf]

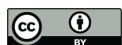

## *Supplement of*

# **Sources and pathways of biocides and their transformation products in urban storm water infrastructure of a 2 ha urban district**

**Felicia Linke et al.**

*Correspondence to:* Felicia Linke ([felicia.linke@hydrology.uni-freiburg.de](mailto:felicia.linke@hydrology.uni-freiburg.de))

- [hess-25-4495-2021-supplement-title-page.pdf](#)
- [TableS1.pdf](#)
- [TableS2.pdf](#)

The copyright of individual parts of the supplement might differ from the article licence.
