# Supplementary material for: Sources and pathways of biocides and their transformation products in urban storm water infrastructure of a 2 ha urban district
Source: Copernicus journal article supplement (doi:10.5194/hess-25-4495-2021), 2021-08-20
Supplement: Supplementary file 1 [file hess-25-4495-2021-supplement.zip › TableS1.pdf]

## Supplement

Table S1. Footprint, height, and facade area of buildings.

| House no. | Footprint size (m) | Height (m) | Approximate facade area covered by paints and renders (m <sup>2</sup> ) |
|-----------|--------------------|------------|-------------------------------------------------------------------------|
| 1         | 624                | 13         | 634                                                                     |
| 2         | 559                | 13         | 577                                                                     |
| 3         | 468                | 13         | 525                                                                     |
| 4         | 446                | 13         | 484                                                                     |
| 5         | 364                | 13         | 426                                                                     |
| 6         | 299                | 13         | 369                                                                     |
| 7         | 257                | 13         | 343                                                                     |
| 8         | 214                | 13         | 296                                                                     |
