# Supplementary material for: Sources and pathways of biocides and their transformation products in urban storm water infrastructure of a 2 ha urban district
Source: Copernicus journal article supplement (doi:10.5194/hess-25-4495-2021), 2021-08-20
Supplement: Supplementary file 1 [file hess-25-4495-2021-supplement.zip › TableS2.pdf]

Table S2: Overview of samples taken including measured concentrations of substances. For duplicates, mean concentrations of the two samples are shown. For LOD and LOQ refer to Table 2. Data was used in Fig. 5-10.

| Step     | Sample type         | Sample location           | Name                      | Sampling date | Additional<br>duplicates | Measured concentration of substances in ng L-1 |           |           |                      |                              |                        |            |
|----------|---------------------|---------------------------|---------------------------|---------------|--------------------------|------------------------------------------------|-----------|-----------|----------------------|------------------------------|------------------------|------------|
|          |                     |                           |                           |               |                          | diuron                                         | terbutryn | OIT       | diuron-<br>desmethyl | terbuthylazine-2-<br>hydroxy | terbutryn-<br>desethyl | terbumeton |
| 1        | Event samples       | Swale                     | Swale                     | 2015-11-20    | 1                        | 173.85                                         | 40.19     | below LOD | below LOD            | 7.31                         | 335.79                 | below LOD  |
|          | Event samples       | Swale                     | Swale                     | 2016-02-09    |                          | 3.61                                           | 12.65     | below LOQ | 4.04                 | 19.69                        | 42.88                  | below LOD  |
|          | Event samples       | Swale                     | Swale                     | 2016-11-06    |                          | 0.56                                           | 6.24      | below LOQ | 2.1                  | below LOD                    | below LOD              | 0.27       |
|          | Event samples       | Swale                     | Swale                     | 2017-05-19    |                          | 4.45                                           | 6.14      | below LOQ | below LOD            | 47.59                        | 61.58                  | below LOD  |
| 2 Part 1 | Event samples       | Rain downpipes            | R1                        | 2020-03-10    | 1                        | below LOD                                      | 13.8      | below LOD | below LOD            | below LOD                    | 33.9                   | below LOD  |
|          | Event samples       | Rain downpipes            | R1                        | 2020-05-11    |                          | below LOD                                      | 17.87     | below LOD | below LOD            | below LOQ                    | 2.2                    | below LOD  |
|          | Event samples       | Rain downpipes            | R1                        | 2020-06-28    |                          | below LOD                                      | 65.3      | below LOD | below LOD            | 155.8                        | 16.4                   | 0.87       |
|          | Event samples       | Rain downpipes            | R2                        | 2020-02-11    |                          | below LOQ                                      | 5.8       | below LOD | below LOQ            | below LOQ                    | below LOD              | below LOD  |
|          | Event samples       | Rain downpipes            | R2                        | 2020-03-10    | 1                        | below LOD                                      | 8.4       | below LOD | below LOD            | below LOQ                    | below LOD              | below LOD  |
|          | Event samples       | Rain downpipes            | R2                        | 2020-05-11    |                          | below LOQ                                      | 6.1       | below LOD | below LOD            | 50                           | below LOQ              | below LOD  |
|          | Event samples       | Rain downpipes            | R2                        | 2020-06-28    |                          | below LOD                                      | 6.0       | below LOD | below LOD            | below LOQ                    | below LOD              | below LOD  |
|          | Event samples       | Rain downpipes            | R4-P1                     | 2019-11-29    |                          | 1016.8                                         | 119.1     | 154.20    | 309.8                | below LOQ                    | 3                      | below LOD  |
|          | Event samples       | Rain downpipes            | R4-P1                     | 2020-02-11    | 1                        | 807.2                                          | 47.2      | 55.00     | 284                  | below LOQ                    | 2.8                    | below LOD  |
|          | Event samples       | Rain downpipes            | R4-P1                     | 2020-03-02    | 1                        | 317.85                                         | 27.95     | 0.50      | 183.65               | below LOQ                    | 3.1                    | below LOD  |
|          | Event samples       | Rain downpipes            | R4-P1                     | 2020-03-10    | 1                        | 591.9                                          | 95.3      | 77.50     | 320.5                | below LOD                    | 3.8                    | below LOD  |
|          | Event samples       | Rain downpipes            | R4-P1                     | 2020-06-28    |                          | 257.5                                          | 13.2      | 0.50      | 269.2                | below LOQ                    | 2.3                    | below LOD  |
|          | Event samples       | Rain downpipes            | R4-P2                     | 2020-02-11    |                          | 685                                            | 49        | 60.40     | below LOQ            | below LOD                    | 2.3                    | 0.8        |
|          | Event samples       | Rain downpipes            | R4-P2                     | 2020-03-02    |                          | 248.8                                          | 98.4      | below LOD | 140.9                | below LOD                    | 7.21                   | below LOD  |
|          | Event samples       | Rain downpipes            | R4-P2                     | 2020-03-10    | 1                        | 304.6                                          | 17.4      | 33.00     | 179.7                | below LOD                    | 0.66                   | below LOD  |
|          | Event samples       | Rain downpipes            | R4-P2                     | 2020-06-28    | 1                        | 121.5                                          | 63.5      | 0.38      | 103.9                | below LOD                    | 7.5                    | below LOD  |
|          | Elution experiments | Facades                   | F2                        | 2020-05-26    | 1                        | below LOD                                      | below LOD | below LOD | below LOQ            | 136                          | below LOD              | below LOD  |
|          | Elution experiments | Facades                   | F2                        | 2020-05-26    |                          | below LOD                                      | below LOD | below LOD | below LOQ            | 114.3                        | below LOD              | below LOD  |
|          | Elution experiments | Facades                   | F4                        | 2020-05-26    |                          | below LOD                                      | below LOD | below LOD | below LOD            | below LOD                    | below LOD              | below LOD  |
|          | Elution experiments | Facades                   | F4                        | 2020-05-26    |                          | below LOD                                      | below LOD | below LOD | below LOD            | below LOD                    | below LOD              | below LOD  |
|          | Elution experiments | Facades                   | F5                        | 2020-05-26    | 1                        | below LOD                                      | 33.6      | below LOD | below LOD            | 2476.8                       | 31.1                   | below LOD  |
|          | Elution experiments | Facades                   | F5                        | 2020-05-26    |                          | below LOD                                      | 67.3      | below LOD | below LOD            | 4159                         | 64.1                   | below LOD  |
|          | Elution experiments | Roof materials            | Wooden terraces           | 2020-07-06    |                          | below LOD                                      | below LOD | below LOD | below LOD            | below LOD                    | below LOD              | below LOD  |
|          | Elution experiments | Roof materials            | Wooden terraces           | 2020-07-06    |                          | below LOD                                      | below LOD | below LOD | below LOD            | below LOD                    | below LOD              | below LOD  |
|          | Elution experiments | Roof materials            | Wooden terraces           | 2020-07-06    | 1                        | below LOD                                      | below LOD | below LOD | below LOD            | below LOD                    | below LOD              | below LOD  |
|          | Elution experiments | Roof materials            | Wooden terraces           | 2020-07-06    |                          | below LOD                                      | below LOD | below LOD | below LOD            | below LOD                    | below LOD              | below LOD  |
|          | Elution experiments | Roof materials            | Wooden terraces           | 2020-07-06    |                          | below LOD                                      | below LOD | below LOD | below LOD            | below LOD                    | below LOD              | below LOD  |
|          | Elution experiments | Roof materials            | Wooden terraces           | 2020-07-06    |                          | below LOD                                      | below LOD | below LOD | below LOD            | below LOD                    | below LOD              | below LOD  |
|          | Elution experiments | Roof materials            | Wooden terraces           | 2020-07-06    | 1                        | below LOD                                      | below LOD | 16.30     | below LOD            | below LOD                    | below LOD              | below LOD  |
|          | Elution experiments | Roof materials            | Railibelow LODs           | 2020-06-23    |                          | below LOD                                      | 0.6       | 4.50      | below LOD            | below LOD                    | below LOD              | below LOD  |
|          | Elution experiments | Roof materials            | Railibelow LODs           | 2020-06-23    |                          | below LOD                                      | 0.6       | 2.00      | below LOD            | below LOD                    | below LOD              | below LOD  |
|          | Elution experiments | Roof materials            | Roofibelow LOD foils      | 2020-06-23    |                          | below LOD                                      | below LOD | 6.90      | below LOD            | below LOD                    | below LOD              | below LOD  |
|          | Elution experiments | Roof materials            | Roofibelow LOD foils      | 2020-06-23    | 1                        | below LOD                                      | below LOD | 1.70      | below LOD            | below LOD                    | below LOD              | below LOD  |
|          | Elution experiments | Roof materials            | Roof access               | 2020-06-23    |                          | below LOD                                      | 0.4       | below LOD | 11.4                 | below LOD                    | below LOD              | below LOD  |
|          | Elution experiments | Roof materials            | Roof claddibelow LOD      | 2020-06-23    |                          | below LOD                                      | below LOD | below LOD | 12.3                 | below LOD                    | below LOD              | below LOD  |
|          | Elution experiments | Roof materials            | Elevator shaft foil       | 2020-07-20    |                          | below LOD                                      | below LOD | 0.30      | below LOD            | below LOD                    | below LOD              | below LOD  |
|          | Elution experiments | Roof materials            | grass foil                | 2020-07-20    | 1                        | below LOD                                      | below LOD | below LOD | below LOD            | below LOD                    | below LOD              | below LOD  |
|          | Elution experiments | Newly painted roof facade | Newly painted roof facade | 2020-07-20    |                          | 2941                                           | below LOD | 2898.00   | 2457                 | below LOD                    | below LOD              | below LOD  |
|          | Elution experiments | Newly painted roof facade | Newly painted roof facade | 2020-07-20    |                          | 2090                                           | below LOD | 2156.80   | 1649                 | below LOD                    | below LOD              | below LOD  |
|          | Elution experiments | Newly painted roof facade | Newly painted roof facade | 2020-07-20    |                          | 3071                                           | below LOD | 2977.00   | 1699                 | below LOD                    | below LOD              | below LOD  |
|          | Elution experiments | Old roof facade           | Old roof facade           | 2020-07-20    | 1                        | 143.6                                          | below LOD | 73.40     | 73.9                 | below LOD                    | below LOD              | below LOD  |
|          | Elution experiments | Old roof facade           | Old roof facade           | 2020-06-23    |                          | below LOD                                      | below LOD | 7.10      | below LOD            | below LOD                    | below LOD              | below LOD  |
|          | Elution experiments | Old roof facade           | Old roof facade           | 2020-06-23    |                          | below LOD                                      | below LOD | 7.50      | below LOD            | below LOD                    | below LOD              | below LOD  |
|          | Leaching test       | Wooden terrace            | HO1                       | 2020-06-02    |                          | below LOD                                      | below LOD | below LOD | below LOD            | below LOD                    | below LOD              | below LOD  |
|          | Leaching test       | Wooden terrace            | HO2                       | 2020-06-02    | 1                        | below LOD                                      | below LOD | below LOD | below LOD            | below LOD                    | below LOD              | below LOD  |
| 2 Part 2 | Event samples       | Drainage pipes            | S9                        | 2019-09-08    |                          | below LOD                                      | 70.5      | below LOD | below LOD            | below LOQ                    | 1.7                    | below LOD  |
|          | Event samples       | Drainage pipes            | S9                        | 2019-11-29    |                          | 18                                             | 34.8      | 0.49      | below LOQ            | below LOD                    | 11.1                   | below LOD  |
|          | Event samples       | Drainage pipes            | S9                        | 2020-02-11    |                          | below LOQ                                      | 74.6      | below LOD | 21.2                 | below LOQ                    | 3                      | below LOD  |
|          | Event samples       | Drainage pipes            | S9                        | 2020-03-10    |                          | below LOD                                      | 53.9      | below LOD | below LOD            | below LOD                    | 2.1                    | below LOD  |
|          | Event samples       | Drainage pipes            | P10                       | 2019-07-28    | 1                        | below LOD                                      | 60.70     | 1.20      | below LOD            | 48.6                         | 18.5                   | below LOD  |
|          | Event samples       | Drainage pipes            | P10                       | 2019-11-29    |                          | below LOD                                      | 152.6     | below LOD | below LOD            | 93.3                         | 20.2                   | below LOD  |
|          | Event samples       | Drainage pipes            | P10                       | 2020-02-11    |                          | below LOD                                      | 67.4      | below LOD | below LOD            | below LOQ                    | 18.8                   | below LOD  |
|          | Event samples       | Drainage pipes            | P10                       | 2020-03-10    |                          | below LOD                                      | 164.8     | below LOD | below LOD            | 98.2                         | 31.1                   | below LOD  |
|          | Event samples       | Drainage pipes            | P11                       | 2019-07-28    | 1                        | below LOD                                      | 12.3      | below LOD | below LOD            | 67.8                         | 4.4                    | below LOD  |
|          | Event samples       | Drainage pipes            | P11                       | 2019-11-29    |                          | 14.8                                           | 39.1      | below LOD | below LOD            | below LOQ                    | 6.7                    | below LOD  |
|          | Event samples       | Drainage pipes            | P11                       | 2020-02-11    |                          | 16.7                                           | 38.8      | below LOD | 5.7                  | below LOQ                    | 14.2                   | below LOD  |
|          | Event samples       | Drainage pipes            | P11                       | 2020-03-10    |                          | 15.9                                           | 40.3      | below LOD | 6.54                 | below LOD                    | 12.1                   | below LOD  |
